# Supplementary material for: Regular Intake of Green Tea Polyphenols Suppresses the Development of Nonmelanoma Skin Cancer through miR-29-Mediated Epigenetic Modifications
Source: MDPI journal article supplement (doi:10.3390/jcm11020398), 2022-01-13
Supplement: s1 [file s1]

# Supplementary

**Table S1: A list of miRNAs primer's.**

| miRNA name  | Accession number | Forward Primer         | Reverse Primer       | Catalog No. |
|-------------|------------------|------------------------|----------------------|-------------|
| mmu-miR-29a | MIMAT0004631     | CTGATTTCTTTTGGTG TTCAG | GAACATGTCTGCGTATCTC  | MP300235    |
| mmu-miR-29b | MIMAT0000127     | AGCACCATTTGAAATCAGTG   | GAACATGTCTGCGTATCTC  | MP300237    |
| mmu-miR-29c | MIMAT0004632     | GACCGATTTCTCCTGGTG     | GAACATGTCTGCGTATCTC  | MP300238    |
| hsa-mir-29a | MIMAT0004503     | CTGATTTCTTTTGGTG TTC   | GAACATGTCTGCGTATCTC  | HP300281    |
| hsa-miR-29b | MIMAT0004515     | GGTTTCACATGGTGGCT      | GAACATGTCTGCGTATCTC  | HP300283    |
| hsa-miR-29c | MIMAT0004673     | TGACCGATTTCTCCTGG      | GAACATGTCTGCGTATCTC  | HP300284    |
| U6          |                  | CTCGCTTCGGCAGCACA      | AACGCTTCACGAATTTGCGT |             |
